# Supplementary material
Source: MDPI journal article supplement (https://www.mdpi.com/2073-4344/14/3/213)
Supplement: s1 [file s1]

## Supporting information

for

# Non-Symmetrically Fused Bis(arylimino)pyridines with *Para*-Phenyl Substitution: Exploring Their Use as *N',N,N''*-Supports in Iron Ethylene Polymerization Catalysis

Yizhou Wang <sup>1,2</sup>, Zheng Wang <sup>1,3</sup>, Qiuyue Zhang <sup>1</sup>, Yanping Ma <sup>1</sup>, Gregory A. Solan <sup>1,4,\*</sup>, Yang Sun <sup>1</sup> and Wen-Hua Sun <sup>1,2,\*</sup>

<sup>1</sup> Key Laboratory of Engineering Plastics and Beijing National Laboratory for Molecular Sciences, Institute of Chemistry Chinese Academy of Sciences, Beijing 100190, China; wangyizhou13@iccas.ac.cn (Y.W.); wangzheng@iccas.ac.cn (Z.W.); zhangqiuyue@iccas.ac.cn (Q.Z.); myanping@iccas.ac.cn (Y.M.); sy0471103@iccas.ac.cn (Y.S.)

<sup>2</sup> CAS Research/Education Center for Excellence in Molecular Sciences, University of Chinese Academy of Sciences, Beijing 100049, China

<sup>3</sup> College of Science, Hebei Agricultural University, Baoding 071001, China

<sup>4</sup> Department of Chemistry, University of Leicester, University Road, Leicester LE1 7RH, UK

\* Correspondence: gas8@leicester.ac.uk (G.A.S.); whsun@iccas.ac.cn (W.-H.S.);  
Tel.: +44-(0)116-2522096 (G.A.S.); +86-10-6255-7955 (W.-H.S.)

### Table of Contents

|    |                                                                                                                                    |     |
|----|------------------------------------------------------------------------------------------------------------------------------------|-----|
| 1. | GPC traces of selected polyethylenes along with plots of activity and polymer molecular weight as a function of various parameters | S2  |
| 2. | <sup>1</sup> H NMR spectra of selected polyethylenes                                                                               | S3  |
| 3. | Method used to determine the ratio of different end groups in the polymers                                                         | S8  |
| 4. | X-ray crystallographic studies                                                                                                     | S8  |
| 5. | FT-IR spectra of <b>Fe1–Fe5</b>                                                                                                    | S9  |
| 6. | Mass spectra of <b>Fe1–Fe5</b>                                                                                                     | S11 |
| 7. | References                                                                                                                         | S14 |

# 1. GPC traces of selected polyethylenes along with plots of activity and polymer molecular weight as a function of various parameters

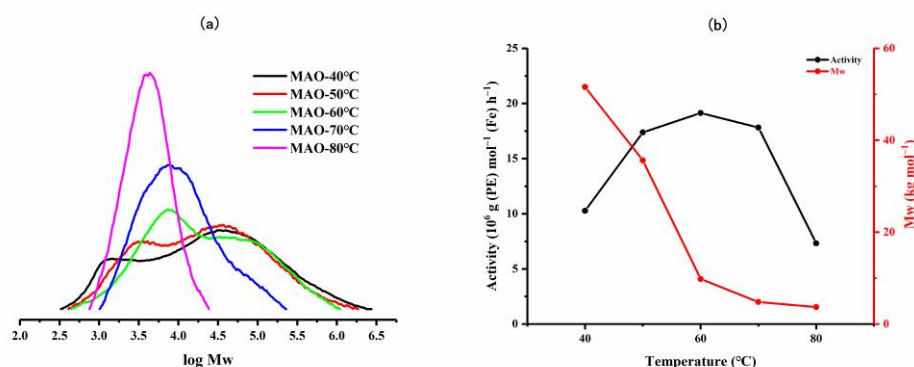

**Figure S1.** (a) GPC traces for the polyethylenes generated using Fe<sub>4</sub>/MAO at different run temperatures and (b) plots of catalytic activity and polymer molecular weight as function of run temperature.

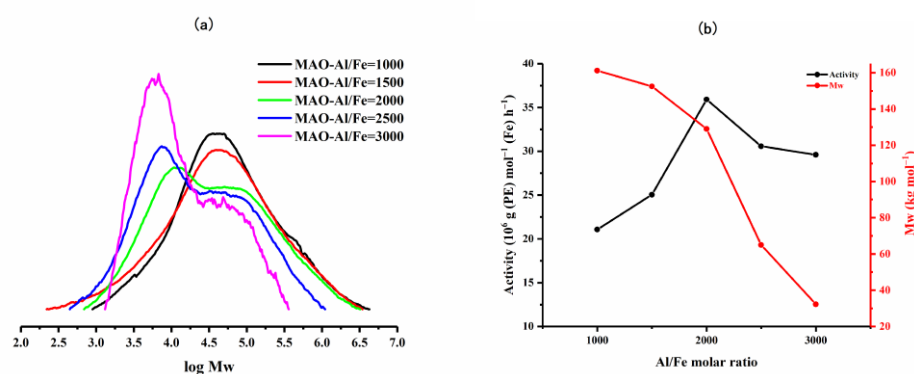

**Figure S2.** (a) GPC traces for the polyethylenes generated using Fe<sub>4</sub>/MAO at various Al:Fe molar ratios and (b) plots of catalytic activity and polymer molecular weight as a function of Al:Fe molar ratio.

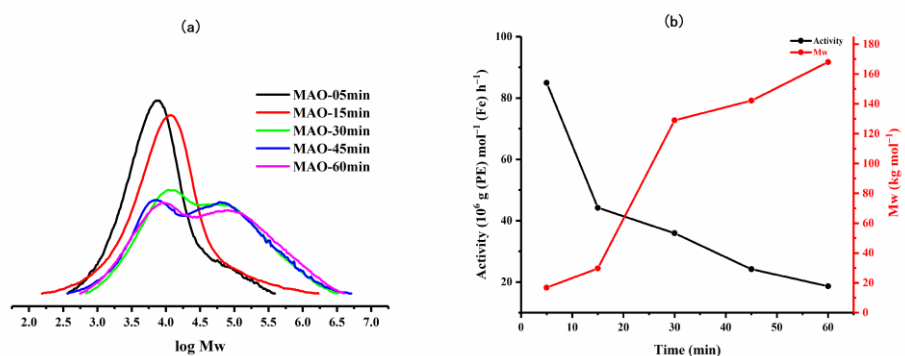

**Figure S3.** (a) GPC traces for the polyethylenes generated using Fe<sub>4</sub>/MAO over reaction time and (b) plots of catalytic activity and polymer molecular weight as a function of reaction time.

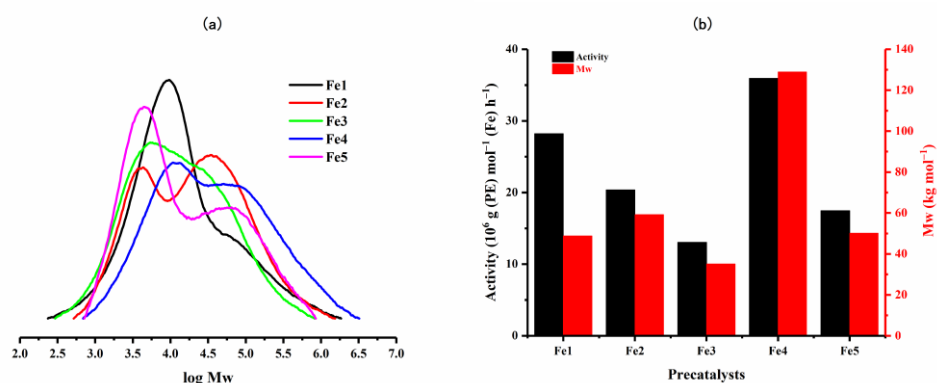

**Figure S4.** (a) GPC traces for the polyethylenes generated using **Fe1–Fe5** under MAO activation and (b) a bar chart showing the effects of variation in *N*-aryl group in **Fe1–Fe5** on catalytic activity and polymer molecular weight.

## 2.1. <sup>1</sup>H NMR spectra of selected polyethylenes

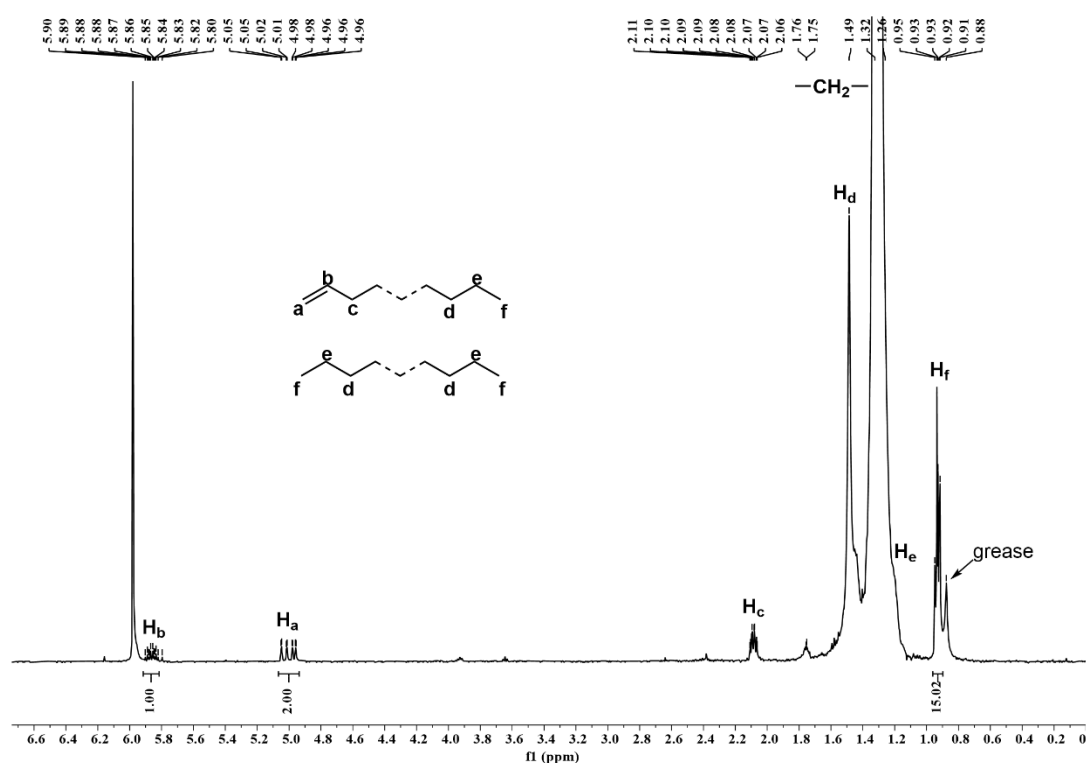

**Figure S5.** <sup>1</sup>H NMR spectrum of the polyethylene produced using **Fe4**/MMAO operating at 70 °C (entry 4, Table 2); recorded at 100 °C in 1,1,2,2-tetrachloroethane-*d*<sub>2</sub>. The weak signal at *ca.* 0.87–0.88 ppm is attributed to the protons belonging to the methyl group in grease [1].

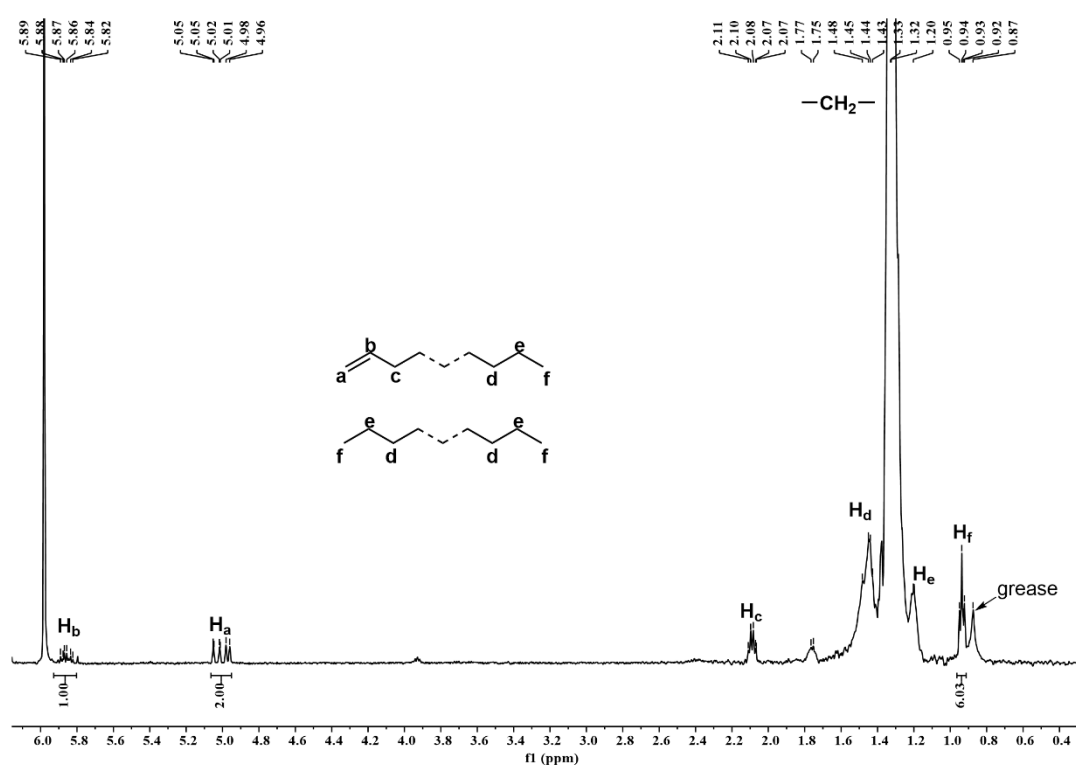

**Figure S6.**  $^1\text{H}$  NMR spectrum of the polyethylene produced using  $\text{Fe4/MMAO}$  operating at  $60\text{ }^\circ\text{C}$  (entry 3, Table 2); recorded at  $100\text{ }^\circ\text{C}$  in  $1,1,2,2\text{-tetrachloroethane-}d_2$ . The weak signal at  $ca. 0.87\text{--}0.88\text{ ppm}$  is attributed to the protons belonging to the methyl group in grease [1].

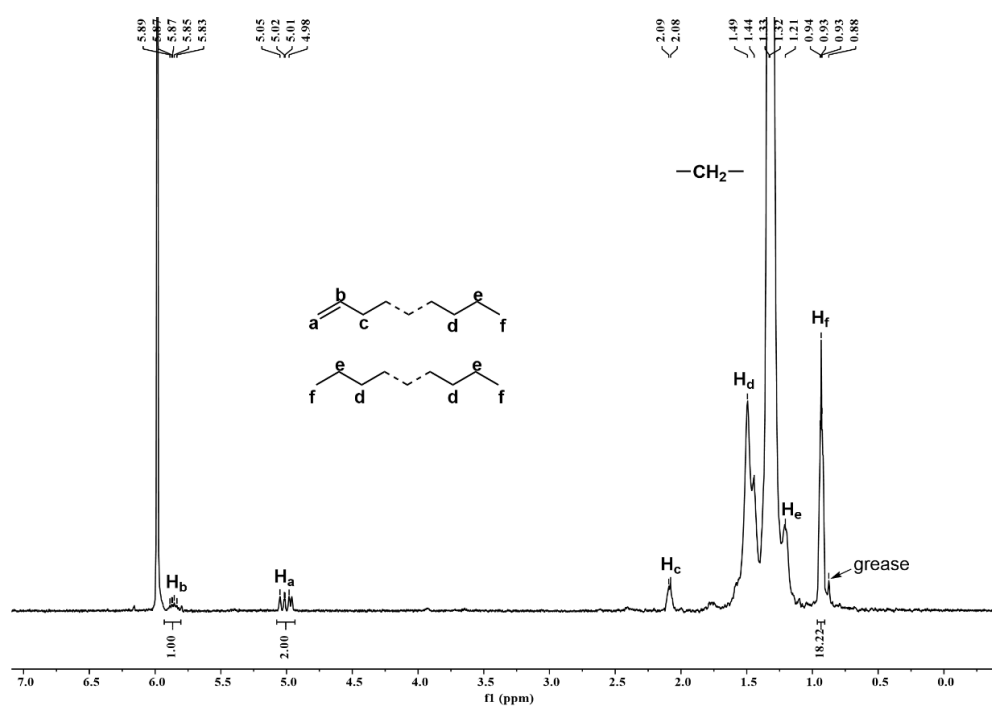

**Figure S7.**  $^1\text{H}$  NMR spectrum of the polyethylene produced using  $\text{Fe4/MMAO}$  operating at  $50\text{ }^\circ\text{C}$  (entry 2, Table 2); recorded at  $100\text{ }^\circ\text{C}$  in  $1,1,2,2\text{-tetrachloroethane-}d_2$ . The weak signal at  $ca. 0.87\text{--}0.88\text{ ppm}$  is attributed to the protons belonging to the methyl group in grease [1].

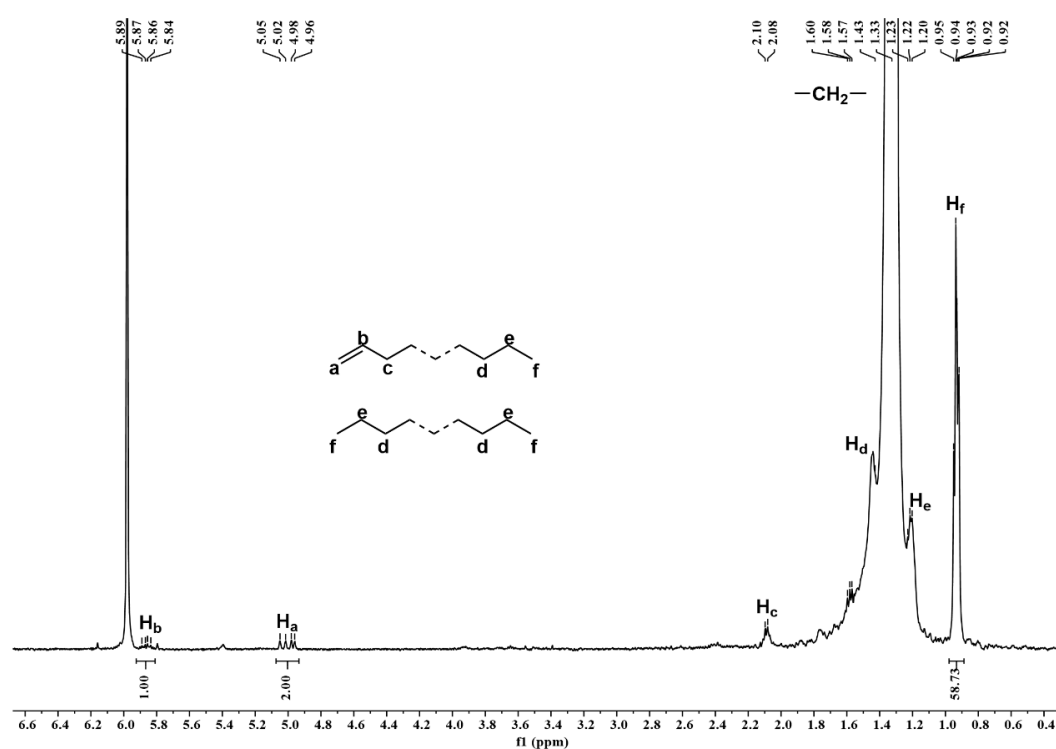

**Figure S8.** <sup>1</sup>H NMR spectrum of the polyethylene produced using **Fe4**/MMAO operating at 40 °C (entry 1, Table 2); recorded at 100 °C in 1,1,2,2-tetrachloroethane-*d*<sub>2</sub>.

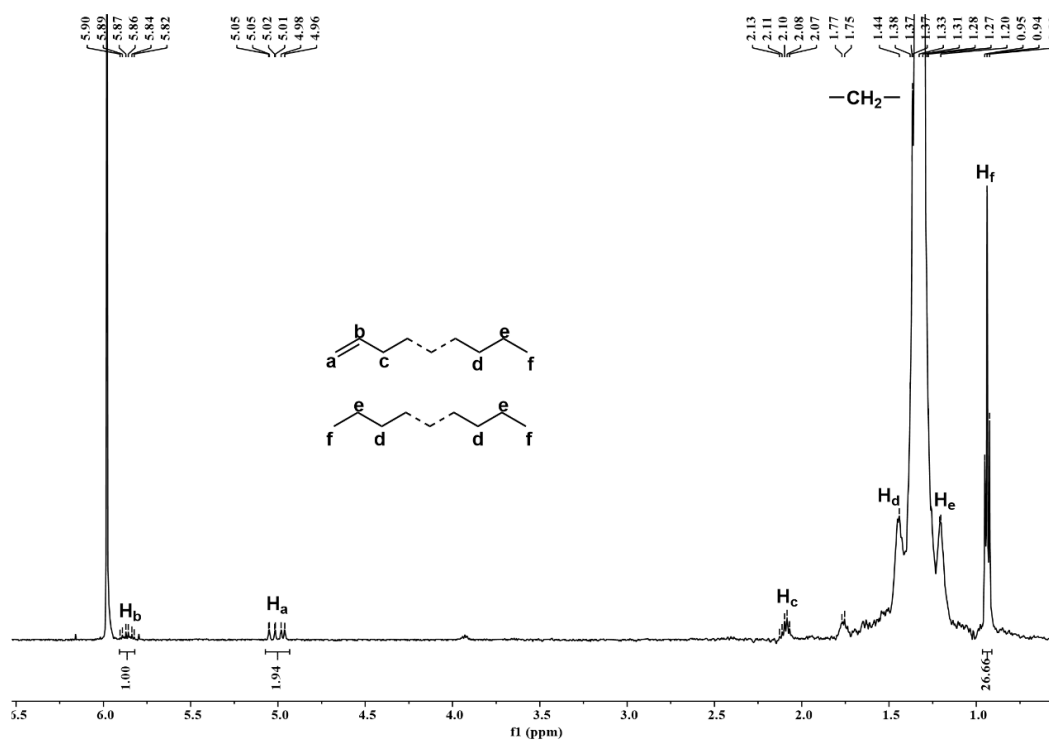

**Figure S9.** <sup>1</sup>H NMR spectrum of the polyethylene produced using **Fe4**/MAO operating at 40 °C (entry 1, Table 3); recorded at 100 °C in 1,1,2,2-tetrachloroethane-*d*<sub>2</sub>.

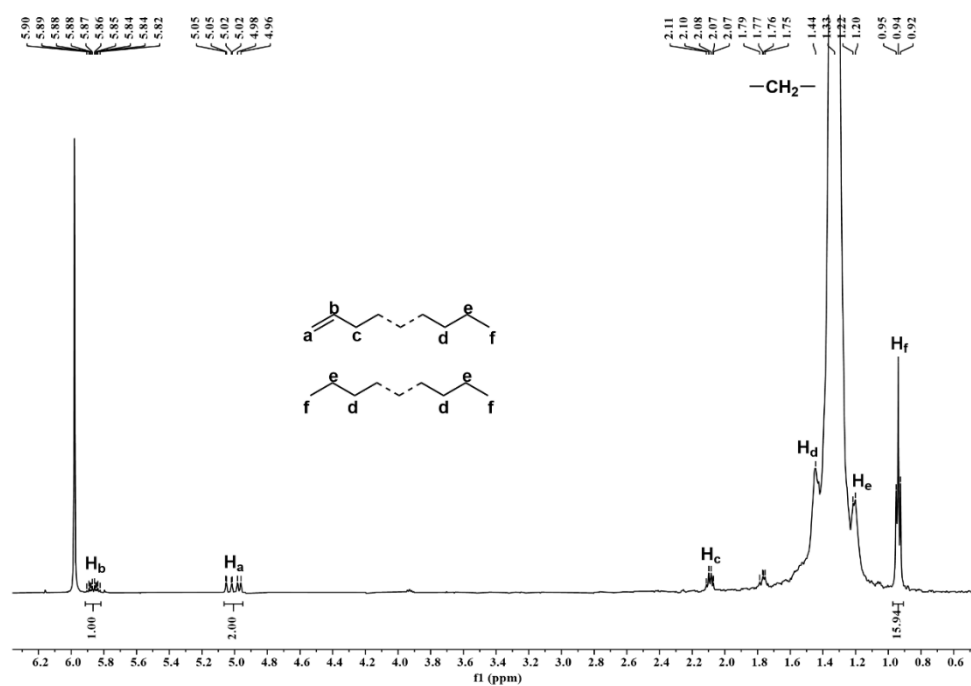

**Figure S10.** <sup>1</sup>H NMR spectrum of the polyethylene produced using Fe4/MAO operating at 50 °C (entry 2, Table 3); recorded at 100 °C in 1,1,2,2-tetrachloroethane-*d*<sub>2</sub>.

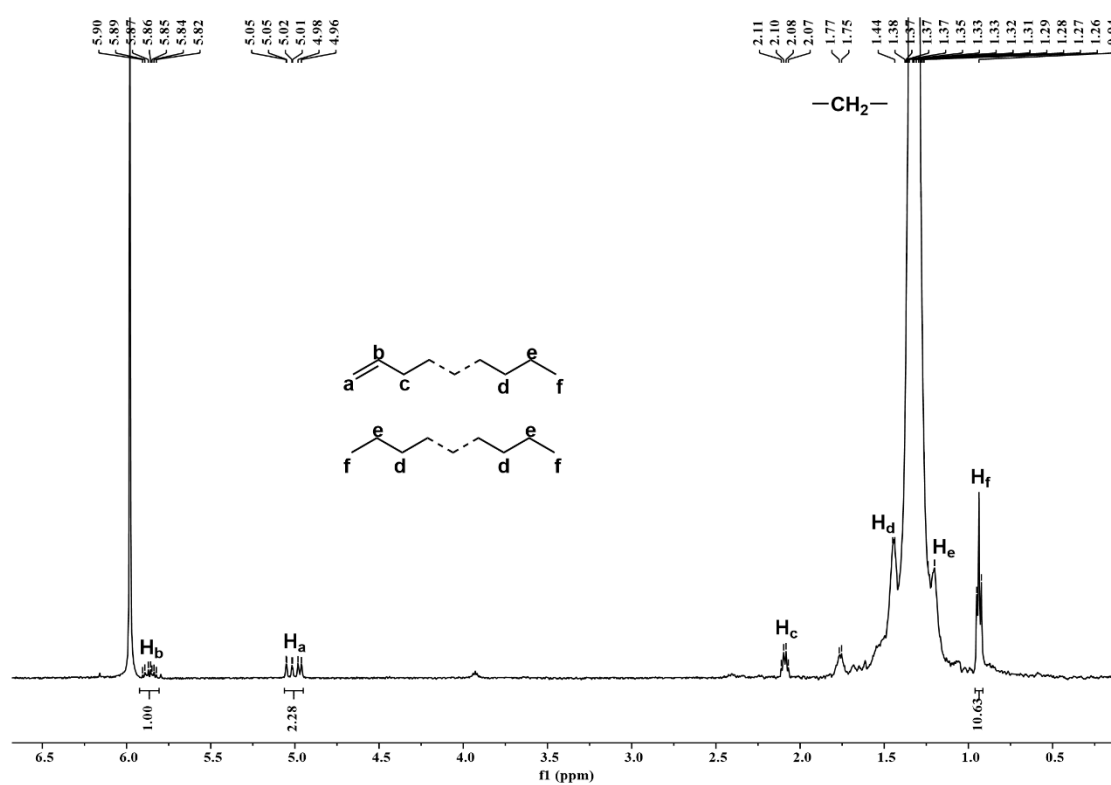

**Figure S11.** <sup>1</sup>H NMR spectrum of the polyethylene produced using Fe4/MAO operating at 60 °C (entry 3, Table 3); recorded at 100 °C in 1,1,2,2-tetrachloroethane-*d*<sub>2</sub>.

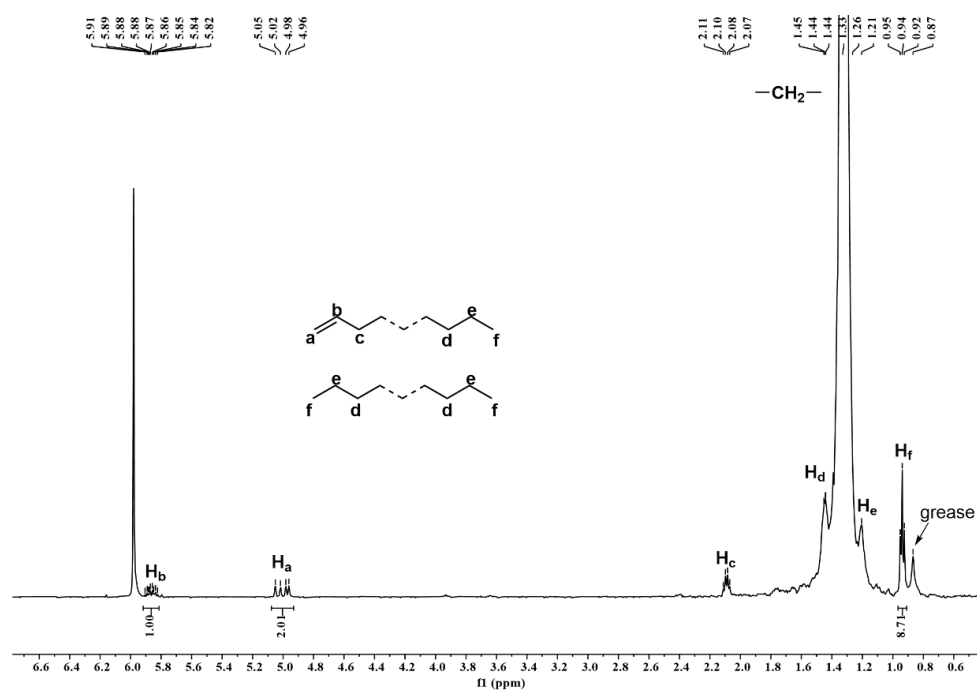

**Figure S12.**  $^1\text{H}$  NMR spectrum of the polyethylene produced using **Fe4**/MAO operating at 70 °C (entry 4, Table 3); recorded at 100 °C in 1,1,2,2-tetrachloroethane- $d_2$ . The weak signal at ca. 0.87–0.88 ppm is attributed to the protons belonging to the methyl group in grease [1].

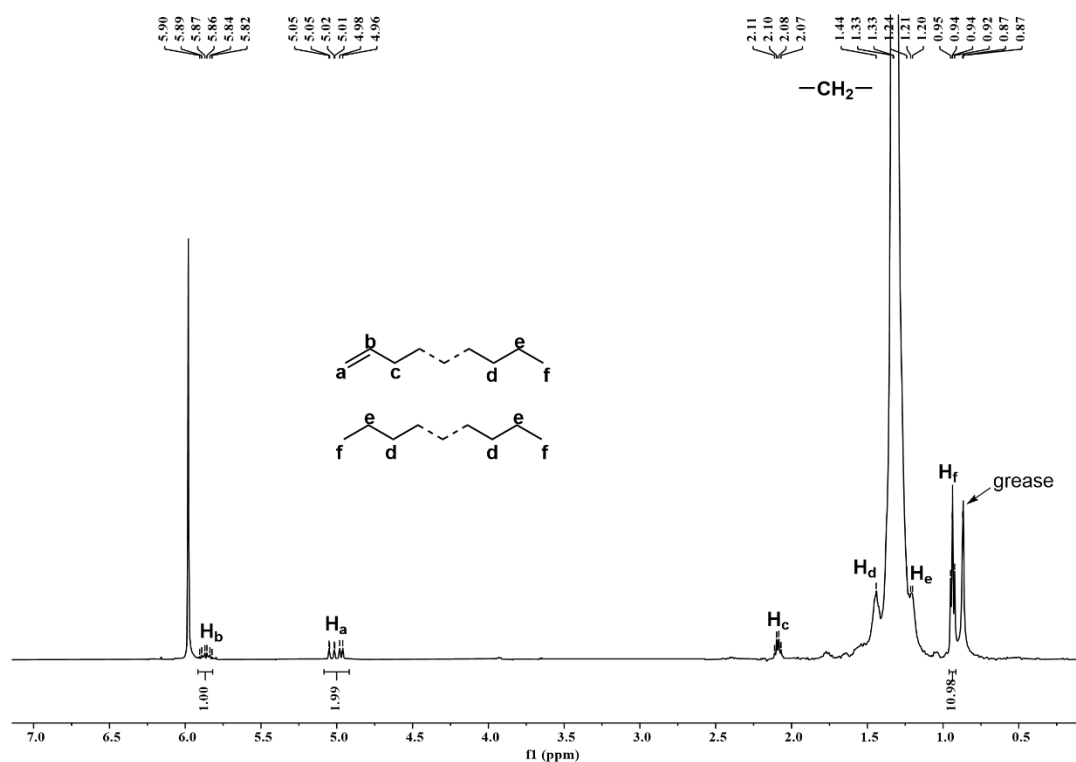

**Figure S13.**  $^1\text{H}$  NMR spectrum of the polyethylene produced using **Fe4**/MAO operating at 80 °C (entry 5, Table 3); recorded at 100 °C in 1,1,2,2-tetrachloroethane- $d_2$ . The weak signal at ca. 0.87–0.88 ppm is attributed to the protons belonging to the methyl group in grease [1].

### 3. Method used to determine the ratio of different end groups in the polymers

On the basis of previous work undertaken using iron ethylene polymerization catalysis [2–4], it has been demonstrated that there can be two different types of end-group in their highly linear polyethylenes, one based on a vinyl group and the other a saturated *n*-propyl group. As a result, two different polymer chains can be produced, one chain contains a vinyl and a saturated *n*-propyl chain end (chain A, the amount is set as *a*), while the other has both saturated *n*-propyl end-groups (chain B, the amount is set as *b*).

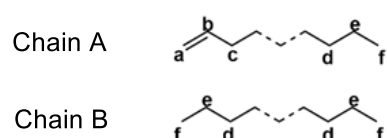

By using the corresponding signals in the  $^1\text{H}$  NMR spectrum, the integral for the vinyl protons and *n*-propyl protons can then be measured. With regard to the spectra shown in Figures S5–S8 and S9–S13 above, the integral of the vinyl proton  $\text{H}_b$  can be set as *x*, and the integral of the methyl protons  $\text{H}_f$  in the *n*-propyl group can be set as *y*. Then from the equation  $a / (3a + 6b) = x / y$ , the molar ratio can be expressed as:

$$a / b = 6 / ((y / x) - 3)$$

Tables S1 and S2 show the molar ratios for *a* to *b* in the PE's generated using **Fe4**/MMAO and **Fe4**/MAO at various temperatures, respectively.

**Table S1.** Determining the molar ratios of *a* (chain A, unsaturated) to *b* (chain B, fully saturated) for the PE's produced using **Fe4**/MMAO at various temperatures.

| Run temperature          | $^1\text{H}$ NMR spectrum | Ratio of <i>x</i> / <i>y</i> | Molar ratio, <i>a</i> / <i>b</i> |
|--------------------------|---------------------------|------------------------------|----------------------------------|
| 80 °C (entry 5, Table 2) | Figure 9                  | 1/18.82                      | 0.379                            |
| 70 °C (entry 4, Table 2) | Figure S5                 | 1/15.02                      | 0.500                            |
| 60 °C (entry 3, Table 2) | Figure S6                 | 1/6.03                       | 1.980                            |
| 50 °C (entry 2, Table 2) | Figure S7                 | 1/18.22                      | 0.394                            |
| 40 °C (entry 1, Table 2) | Figure S8                 | 1/58.73                      | 0.108                            |

**Table S2.** Determining the molar ratios of *a* (chain A, unsaturated) to *b* (chain B, fully saturated) for the PE's produced using **Fe4**/MAO at various temperatures.

| Run temperature          | $^1\text{H}$ NMR spectrum | Ratio of <i>x</i> / <i>y</i> | Molar ratio, <i>a</i> / <i>b</i> |
|--------------------------|---------------------------|------------------------------|----------------------------------|
| 80 °C (entry 5, Table 3) | Figure S13                | 1/10.98                      | 0.752                            |
| 70 °C (entry 4, Table 3) | Figure S12                | 1/8.71                       | 1.050                            |
| 60 °C (entry 3, Table 3) | Figure S11                | 1/10.63                      | 0.786                            |
| 50 °C (entry 2, Table 3) | Figure S10                | 1/15.94                      | 0.464                            |
| 40 °C (entry 1, Table 3) | Figure S9                 | 1/26.66                      | 0.254                            |



#### 4. X-ray crystallographic studies

**Table S3.** Crystal data and structure refinement for **Fe2** and **Fe3**.

|                                             | <b>Fe2·CH<sub>2</sub>Cl<sub>2</sub></b>                          | <b>Fe3</b>                                                       |
|---------------------------------------------|------------------------------------------------------------------|------------------------------------------------------------------|
| CCDC number                                 | 2325145                                                          | 2325146                                                          |
| Empirical formula                           | C <sub>41</sub> H <sub>47</sub> Cl <sub>4</sub> FeN <sub>3</sub> | C <sub>44</sub> H <sub>53</sub> Cl <sub>2</sub> FeN <sub>3</sub> |
| Formula weight                              | 779.46                                                           | 750.64                                                           |
| Temperature/K                               | 170(2)                                                           | 169.99(10)                                                       |
| Crystal system                              | monoclinic                                                       | monoclinic                                                       |
| Space group                                 | Ia                                                               | P2 <sub>1</sub> /n                                               |
| a/Å                                         | 12.1167(3)                                                       | 12.4769(3)                                                       |
| b/Å                                         | 19.7628(4)                                                       | 17.4319(3)                                                       |
| c/Å                                         | 16.8845(4)                                                       | 18.3814(3)                                                       |
| α/°                                         | 90                                                               | 90                                                               |
| β/°                                         | 108.717(2)                                                       | 103.969(2)                                                       |
| γ/°                                         | 90                                                               | 90                                                               |
| Volume/Å <sup>3</sup>                       | 3829.34(16)                                                      | 3879.65(14)                                                      |
| Z                                           | 4                                                                | 4                                                                |
| ρ <sub>calc</sub> /cm <sup>3</sup>          | 1.352                                                            | 1.285                                                            |
| μ/mm <sup>-1</sup>                          | 5.974                                                            | 4.638                                                            |
| F(000)                                      | 1632.0                                                           | 1592.0                                                           |
| Crystal size/mm <sup>3</sup>                | 0.28 × 0.24 × 0.1                                                | 0.3 × 0.25 × 0.15                                                |
| Radiation                                   | CuKα (λ = 1.54184)                                               | CuKα (λ = 1.54184)                                               |
| 2θ range for data collection/°              | 7.11 to 154.13                                                   | 7.09 to 154.68                                                   |
| Index ranges                                | -15 ≤ h ≤ 15, -24 ≤ k ≤ 9, -17 ≤ l ≤ 21                          | -14 ≤ h ≤ 15, -19 ≤ k ≤ 21, -23 ≤ l ≤ 18                         |
| Reflections collected                       | 13519                                                            | 32687                                                            |
| Independent reflections                     | 6053 [R <sub>int</sub> = 0.0305, R <sub>sigma</sub> = 0.0332]    | 7922 [R <sub>int</sub> = 0.1178, R <sub>sigma</sub> = 0.0730]    |
| Data/restraints/parameters                  | 6053/8/446                                                       | 7922/259/541                                                     |
| Goodness-of-fit on F <sup>2</sup>           | 1.046                                                            | 0.887                                                            |
| Final R indexes [I ≥ 2σ (I)]                | R <sub>1</sub> = 0.0758, wR <sub>2</sub> = 0.1977                | R <sub>1</sub> = 0.0672, wR <sub>2</sub> = 0.1997                |
| Final R indexes [all data]                  | R <sub>1</sub> = 0.0779, wR <sub>2</sub> = 0.2010                | R <sub>1</sub> = 0.0825, wR <sub>2</sub> = 0.2219                |
| Largest diff. peak/hole / e Å <sup>-3</sup> | 0.67/-0.71                                                       | 1.66/-0.56                                                       |

#### 5. FT-IR spectra of Fe1–Fe5

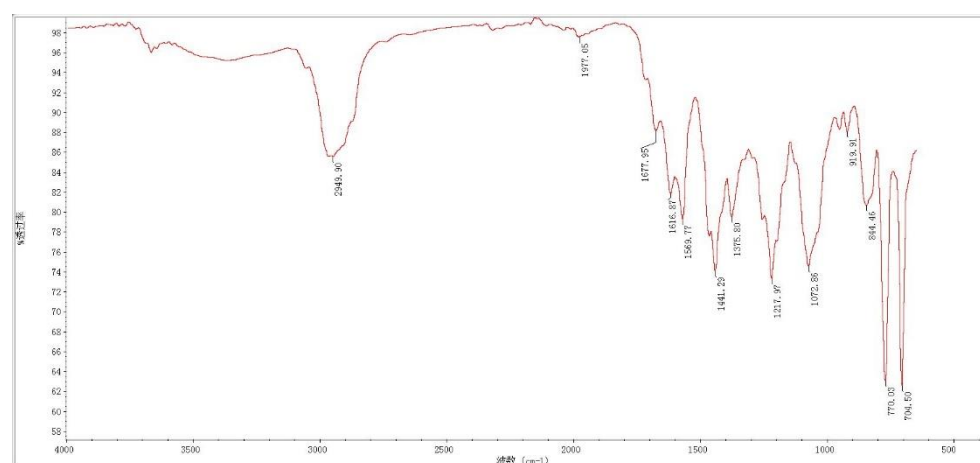

**Figure S14.** FT-IR spectrum of **Fe1**.

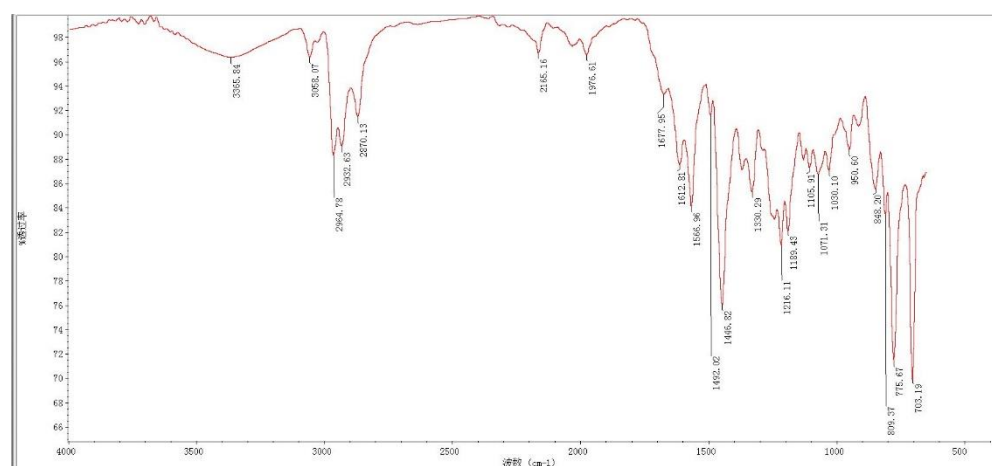

Figure S15. FT-IR spectrum of Fe2.

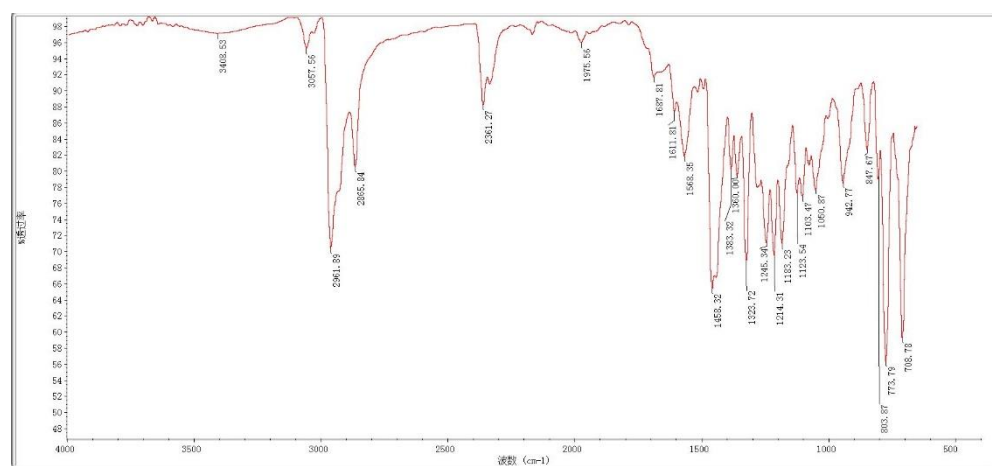

Figure S16. FT-IR spectrum of Fe3.

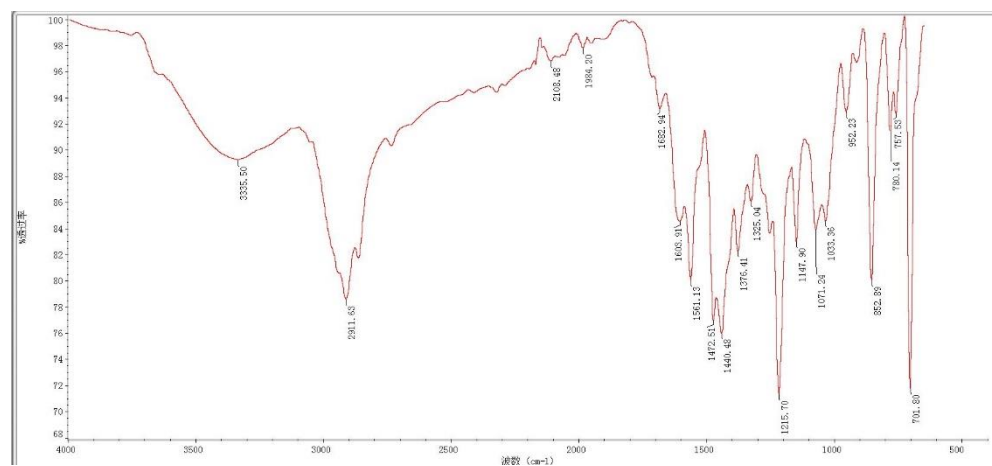

Figure S17. FT-IR spectrum of Fe4.

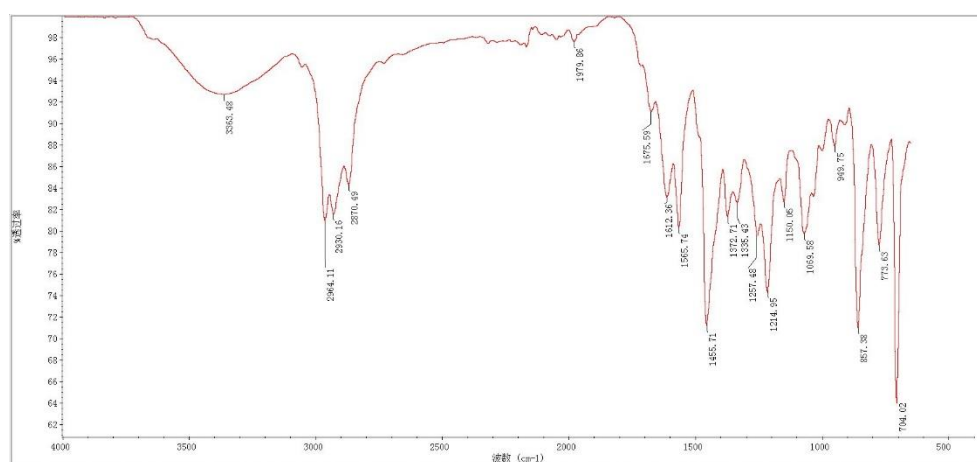

Figure S18. FT-IR spectrum of Fe5.

## 6. Mass spectra of Fe1–Fe5

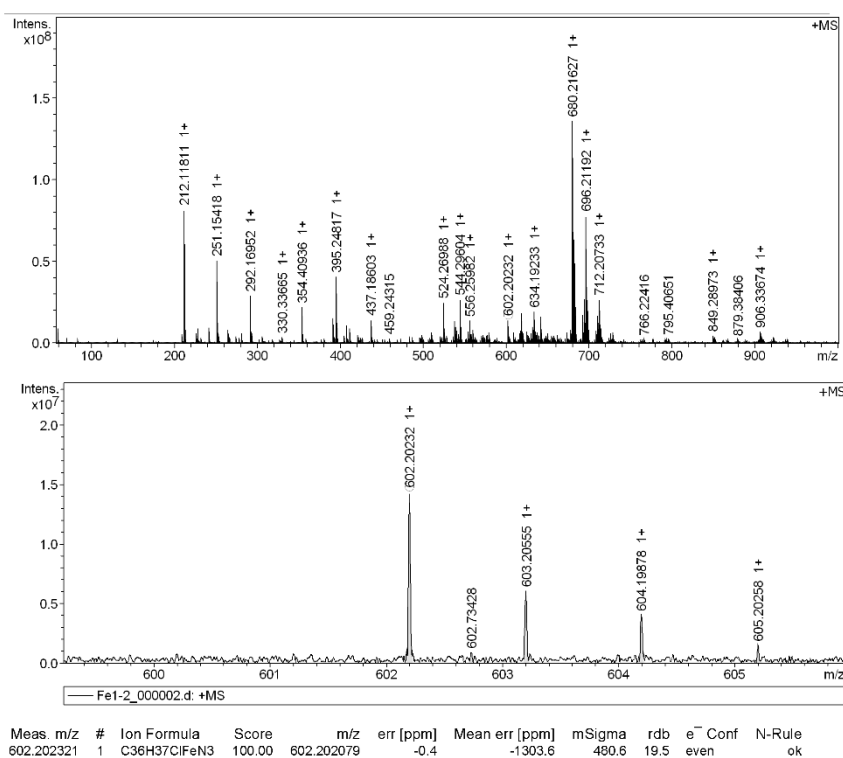

Figure S19. ESI-MS spectrum of Fe1.

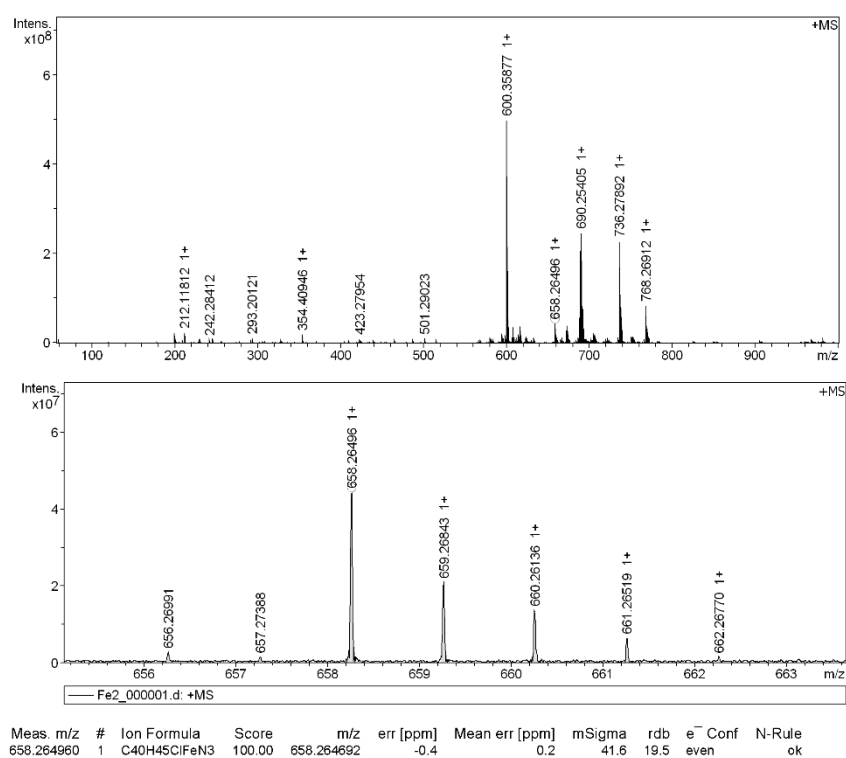

Figure S20. ESI-MS spectrum of Fe2.

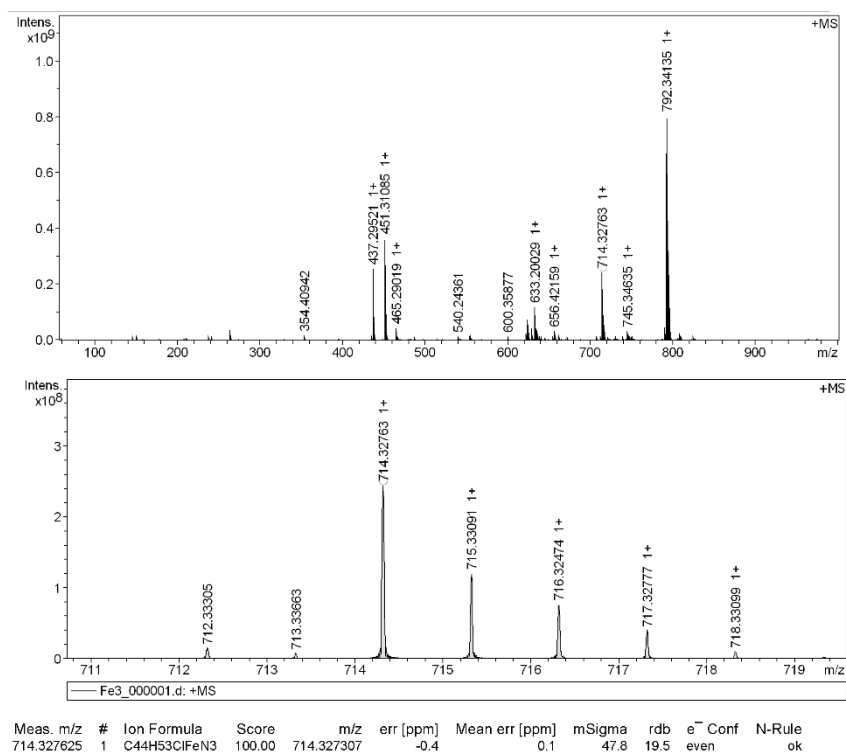

Figure S21. ESI-MS spectrum of Fe3.

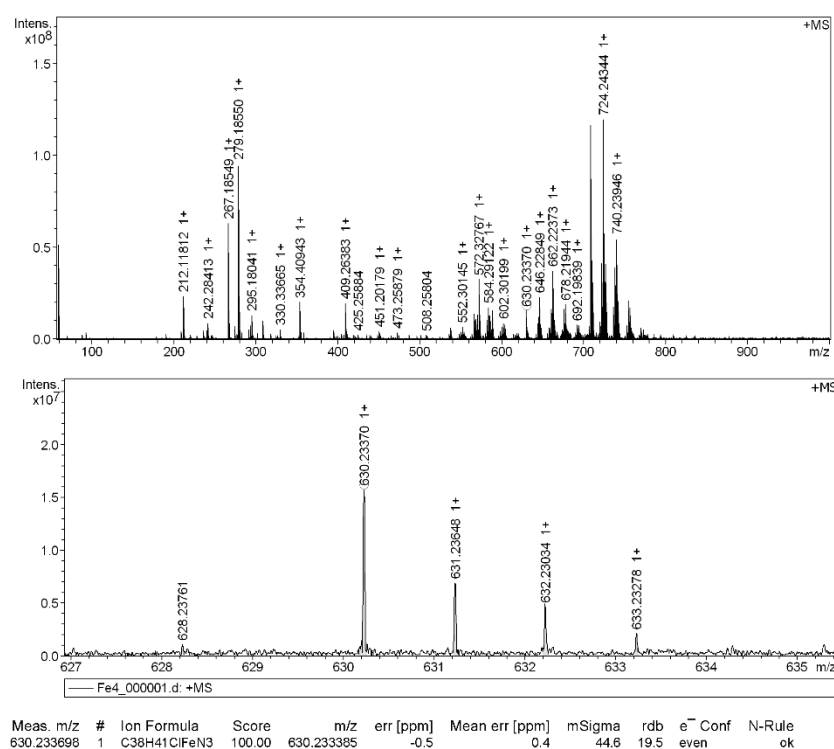

Figure S22. ESI-MS spectrum of Fe4.

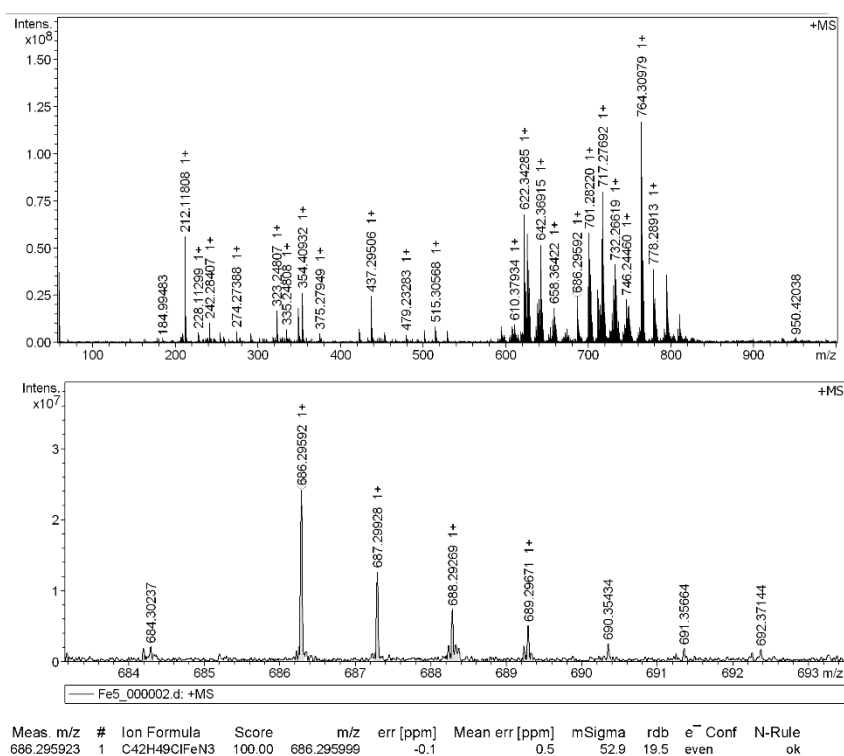

Figure S23. ESI-MS spectrum of Fe5.

## References

1. Fulmer, G.R.; Miller, A.J.M.; Sherden, N.H.; Gottlieb, H.E.; Nudelman, A.; Stoltz, B.M.; Bercaw, J.E.; Goldberg, K.I. NMR Chemical Shifts of Trace Impurities: Common Laboratory Solvents, Organics, and Gases in Deuterated Solvents Relevant to the Organometallic Chemist. *Organometallics* **2010**, *29*, 2176–2179.
2. Zhang, Q.; Zuo, Z.; Ma, Y.; Liang, T.; Yang, X.; Sun, W.-H. Fluorinated 2,6-bis(arylimino)pyridyl iron complexes targeting bimodal dispersive polyethylenes: Probing chain termination pathways via a combined experimental and DFT study. *Dalton Trans.* **2022**, *51*, 8290–8302.
3. Wang, Z.; Solan, G.A.; Ma, Y.; Liu, Q.; Liang, T.; Sun, W.-H. Fusing Carbocycles of Inequivalent Ring Size to a Bis(imino)pyridine-Iron Ethylene Polymerization Catalyst: Distinctive Effects on Activity, PE Molecular Weight, and Dispersity. *Research* **2019**, *2019*, 9426063.
4. Wang, Y.; Wang, Z.; Zhang, Q.; Zou, S.; Ma, Y.; Solan, G.A.; Zhang, W.; Sun, W.-H. Exploring Long Range para-Phenyl Effects in Unsymmetrically Fused bis(imino)pyridine-Cobalt Ethylene Polymerization Catalysts. *Catalysts* **2023**, *13*, 1387.
