# Supplementary material
Source: MDPI journal article supplement (https://www.mdpi.com/2073-4344/14/3/213)
Supplement: s1 [file s1]

Archive with 1 entries (1 files):
- catalysts-2882393-supplementary.pdf
